# Supplementary material for: Impact of early heparin therapy on mortality in critically ill patients with sepsis-related acute respiratory distress syndrome: a MIMIC-IV database analysis
Source: Research Square preprint supplement (doi:10.21203/rs.3.rs-6980725/v1), 2025-08-06
Supplement: Supplementary file 1 [file 52334f33c1f6fcbb65a58e8e.docx]

Supplementary Table S1. Baseline characteristics of patients enrolled before and after propensity score matching

|  |  |  | **Before PSM** | | | | **After PSM** | | | |
| --- | --- | --- | --- | --- | --- | --- | --- | --- | --- | --- |
|  |  | Overall  (n=6454) | Heparin  (n=2528) | No heparin  (n=3926) | *P* | *SMD* | Heparin  (n=2528) | No heparin  (n=2528) | *P* | *SMD* |
| Age  (years) |  | 63.35 (16.12) | 62.98 (16.83) | 63.59  (15.64) | 0.139 | 0.036 | 62.98  (16.83) | 63.07  (16.00) | 0.857 | 0.005 |
| Gender  (%) | Female | 2513 (38.9) | 1038 (41.1) | 1475  (37.6) | 0.005 | 0.035 | 1038  (41.1) | 993  (39.3) | 0.207 | 0.018 |
|  | Male | 3941 (61.1) | 1490 (58.9) | 2451  (62.4) |  | 0.001 | 1490  (58.9) | 1535  (60.7) |  | 0.002 |
| Weight  (kg) |  | 88.53 (25.63) | 88.55 (26.66) | 88.52  (24.95) | 0.965 | 0.002 | 88.55  (26.66) | 88.60  (25.08) | 0.944 | 0.003 |
| Race  (%) | Black | 392  ( 6.1) | 150  (5.9) | 242  (6.2) | <  0.001 | 0.088 | 150  ( 5.9) | 157  ( 6.2) | 0.019 | 0.036 |
|  | Other | 2479 (38.4) | 835  (33.0) | 1644  (41.9) |  | 0.091 | 835  (33.0) | 925  (36.6) |  | 0.038 |
|  | White | 3583 (55.5) | 1543 (61.0) | 2040  (52.0) |  | 0.001 | 1543  (61.0) | 1446  (57.2) |  | 0.022 |
| Temperature  (℃) |  | 36.28 (0.95) | 36.28 (1.00) | 36.27  (0.91) | 0.818 | 0.104 | 36.28  (1.00) | 36.28  (0.93) | 0.987 | 0.056 |
| Heart rate  (bpm) |  | 72.52 (16.21) | 73.58 (16.78) | 71.84  (15.80) | <  0.001 | 0.043 | 73.58  (16.78) | 72.65  (15.80) | 0.042 | 0.033 |
| Respiratory rate  (brpm) |  | 12.96 (4.16) | 13.06 (4.06) | 12.89  (4.22) | 0.101 | 0.021 | 13.06  (4.06) | 12.93  (4.25) | 0.246 | 0.030 |
| SPO2  (%) |  | 90.92 (7.05) | 90.82 (7.50) | 90.98  (6.74) | 0.379 | 0.127 | 90.82  (7.50) | 91.05  (6.80) | 0.263 | 0.080 |
| MAP  (mmHg) |  | 56.47 (13.74) | 55.37 (14.28) | 57.18  (13.34) | <  0.001 | 0.072 | 55.37  (14.28) | 56.51  (13.75) | 0.004 | 0.038 |
| DBP  (mmHg) |  | 44.99 (10.29) | 44.54 (10.28) | 45.28  (10.29) | 0.005 | 0.086 | 44.54  (10.28) | 44.93  (10.05) | 0.174 | 0.030 |
| SBP  (mmHg) |  | 86.59 (15.61) | 87.42 (16.03) | 86.05  (15.30) | 0.001 | 0.069 | 87.42  (16.03) | 86.94  (14.76) | 0.267 | 0.008 |
| Hypertension  (%) | No | 3724 (57.7) | 1352 (53.5) | 2372  (60.4) | <  0.001 | 0.066 | 1352  (53.5) | 1372  (54.3) | 0.592 | 0.015 |
|  | Yes | 2730 (42.3) | 1176 (46.5) | 1554  (39.6) |  | 0.079 | 1176  (46.5) | 1156  (45.7) |  | 0.010 |
| Diabetes  (%) | No | 4542 (70.4) | 1800 (71.2) | 2742  (69.8) | 0.254 | 0.076 | 1800  (71.2) | 1784  (70.6) | 0.642 | 0.030 |
|  | Yes | 1912 (29.6) | 728  (28.8) | 1184  (30.2) |  | 0.005 | 728  (28.8) | 744  (29.4) |  | 0.010 |
| Atrial fibrillation  (%) | No | 4357 (67.5) | 1808 (71.5) | 2549  (64.9) | <  0.001 | 0.226 | 1808  (71.5) | 1770  (70.0) | 0.253 | 0.096 |
|  | Yes | 2097 (32.5) | 720  (28.5) | 1377  (35.1) |  | 0.011 | 720  (28.5) | 758  (30.0) |  | 0.001 |
| COPD (%) | No | 5936 (92.0) | 2447 (96.8) | 3489  (88.9) | <  0.001 | 0.075 | 2447  (96.8) | 2422  (95.8) | 0.074 | 0.016 |
|  | Yes | 518  ( 8.0) | 81  ( 3.2) | 437  (11.1) |  | 0.342 | 81  ( 3.2) | 106  ( 4.2) |  | 0.040 |
| Coronary heart  (%) | No | 4994 (77.4) | 2073 (82.0) | 2921  (74.4) | <  0.001 | 0.321 | 2073  (82.0) | 1996  (79.0) | 0.007 | 0.052 |
|  | Yes | 1460 (22.6) | 455  (18.0) | 1005  (25.6) |  | 0.163 | 455  (18.0) | 532  (21.0) |  | 0.035 |
| Cardiomyopathy  (%) | No | 6146 (95.2) | 2399 (94.9) | 3747  (95.4) | 0.347 | 0.111 | 2399  (94.9) | 2398  (94.9) | 0.999 | 0.051 |
|  | Yes | 308  ( 4.8) | 129  ( 5.1) | 179  ( 4.6) |  | 0.027 | 129  ( 5.1) | 130  ( 5.1) |  | 0.002 |
| Platelets  (k/uL) |  | 178.64 (100.02) | 192.30  (99.56) | 169.84  (99.34) | <  0.001 | 0.059 | 192.30  (99.56) | 182.77  (103.63) | 0.001 | 0.007 |
| Glucose  (mg/dL) |  | 111.11 (36.44) | 111.71  (35.02) | 110.72  (37.32) | 0.286 | 0.014 | 111.71  (35.02) | 110.25  (36.67) | 0.148 | 0.006 |
| PaO2/FiO2 |  | 156.94 (74.58) | 163.02  (73.15) | 153.03  (75.23) | <  0.001 | 0.001 | 163.02  (73.15) | 159.90  (74.91) | 0.134 | 0.022 |
| PEEP  (cmH₂O) |  | 7.03 (3.24) | 6.85 (3.07) | 7.14  (3.33) | 0.001 | 0.006 | 6.85  (3.07) | 6.92  (3.23) | 0.459 | 0.010 |
| WBC  (k/ul) |  | 11.73 (8.33) | 11.68 (7.73) | 11.76  (8.69) | 0.688 | 0.137 | 11.68  (7.73) | 11.94  (8.49) | 0.243 | 0.043 |
| BUN  (mg/dL) |  | 25.90 (21.24) | 24.99 (20.08) | 26.49  (21.94) | 0.006 | 0.094 | 24.99  (20.08) | 24.83  (21.22) | 0.79 | 0.021 |
| INR |  | 1.35 (0.51) | 1.27 (0.38) | 1.40  (0.57) | <  0.001 | 0.186 | 1.27  (0.38) | 1.28  (0.33) | 0.129 | 0.058 |
| PT  (seconds) |  | 14.79 (5.31) | 14.03 (3.89) | 15.28  (6.00) | <  0.001 | 0.036 | 14.03  (3.89) | 14.10  (3.64) | 0.519 | 0.005 |
| APTT  (seconds) |  | 31.50 (11.01) | 30.59 (9.15) | 32.08  (12.03) | <  0.001 | 0.035 | 30.59  (9.15) | 30.91  (10.62) | 0.246 | 0.018 |
| OASIS |  | 36.80 (8.14) | 37.34 (7.94) | 36.46  (8.24) | <  0.001 | 0.001 | 37.34  (7.94) | 36.93  (8.05) | 0.069 | 0.002 |
| SAPS II |  | 42.62 (14.60) | 42.39 (14.44) | 42.77  (14.70) | 0.3 | 0.002 | 42.39  (14.44) | 42.42  (14.54) | 0.94 | 0.003 |
| GCS |  | 13.18 (3.48) | 13.18 (3.39) | 13.19  (3.54) | 0.963 | 0.006 | 13.18  (3.39) | 13.08  (3.70) | 0.305 | 0.010 |
| SOFA |  | 7.24 (3.81) | 6.83 (3.64) | 7.50  (3.90) | <  0.001 | 0.104 | 6.83 (3.64) | 7.04  (3.72) | 0.043 | 0.056 |
| Ventilation  (%) | No | 2599  (40.3) | 389  (15.4) | 834  (21.2) | <  0.001 | 0.088 | 389  (15.4) | 407  (16.1) | 0.512 | 0.036 |
|  | Yes | 3855  (59.7) | 2139 (84.6) | 3092  (78.8) |  | 0.091 | 2139  (84.6) | 2121  (83.9) |  | 0.038 |
| Vasopressor | No | 1223 (18.9) | 1256  (49.7) | 1343  (34.2) | <  0.001 | 0.043 | 1175  (46.5) | 1191  (47.1) | 0.673 | 0.033 |
|  | Yes | 5231 (81.1) | 1272  (50.3) | 2583  (65.8) |  | 0.021 | 1353  (53.5) | 1337  (52.9) |  | 0.030 |

*Abbreviations: PSM, propensity score matching; SMD, standardized mean difference; SpO2, pulse oxygen saturation; MAP, mean arterial pressure; DBP, diastolic blood pressure; SBP, systolic blood pressure; COPD, chronic obstructive pulmonary disease; PaO2, pressure of alveolar oxygen; FiO2, fraction of inspired oxygen; PEEP, positive end-expiratory pressure; WBC, white blood cell count; BUN, blood urine nitrogen; INR, international normalized ratio; PT, prothrombin time; APTT, activated partial thromboplastin time; OASIS, oxford acute severity of illness score; SAPS II, simplified acute physiology score II; GCS, glasgow coma score; SOFA, sequential organ failure assessment.*
